1 **Multiplexed, bioorthogonal labeling of multicomponent, biomolecular**  
2 **complexes using genomically encoded, non-canonical amino acids**

3

4 Bijoy J. Desai and Ruben L. Gonzalez, Jr.\*

5

6 *Department of Chemistry, Columbia University, 3000 Broadway, MC3126, New York, NY*  
7 *10027, USA*

8

9 \*To whom correspondence should be addressed: Ruben L. Gonzalez Jr., Department of  
10 Chemistry, Columbia University, 3000 Broadway, MC3126, New York, NY 10027, USA, Tel.:  
11 (212) 854-1096; Fax: (212) 932-1289; Email: [rlg2118@columbia.edu](mailto:rlg2118@columbia.edu)

Desai, B.J., *et al.*

12 **Stunning advances in the structural biology of multicomponent biomolecular complexes**  
13 **(MBCs) have ushered in an era of intense, structure-guided mechanistic and functional**  
14 **studies of these complexes. Nonetheless, existing methods to site-specifically conjugate**  
15 **MBCs with biochemical and biophysical labels are notoriously impracticable and/or**  
16 **significantly perturb MBC assembly and function. To overcome these limitations, we**  
17 **have developed a general, multiplexed method in which we genomically encode non-**  
18 **canonical amino acids (ncAAs) into multiple, structure-informed, individual sites within a**  
19 **target MBC; select for ncAA-containing MBC variants that assemble and function like the**  
20 **wildtype MBC; and site-specifically conjugate biochemical or biophysical labels to these**  
21 **ncAAs. As a proof-of-principle, we have used this method to generate unique single-**  
22 **molecule fluorescence resonance energy transfer (smFRET) signals reporting on**  
23 **ribosome structural dynamics that have thus far remained inaccessible to smFRET**  
24 **studies of translation.**

25

26 Many fundamental cellular processes, including DNA repair, replication, transcription,  
27 messenger RNA (mRNA) processing and splicing, nuclear export, mRNA decay, translation,  
28 and protein degradation, are performed by MBCs. Continuing advances in X-ray crystallography  
29 and, more recently, cryogenic electron microscopy (cryo-EM) studies of MBCs are providing  
30 researchers with structural frameworks for most informatively positioning biochemical and  
31 biophysical probes and interpreting the resulting biochemical and biophysical data in terms of  
32 structure-based mechanistic models<sup>1</sup>. Unfortunately, however, it remains difficult and, in some  
33 cases, impossible to site-specifically label MBCs at defined positions, severely impeding  
34 mechanistic and functional studies. The primary reasons for this are that MBCs are composed  
35 of up to thousands of oftentimes essential components, have tightly controlled component  
36 stoichiometries, and are typically assembled through intricate and highly regulated assembly  
37 pathways<sup>2-4</sup>. Consequently, common methods for site-specifically labeling proteins, such as

Desai, B.J., *et al.*

38 conjugation of a maleimide-derivatized reporter to a cysteine residue, are impracticable for  
39 MBCs that contain hundreds of native reactive residues<sup>5</sup>, while the peptide tags often used in  
40 chemo-enzymatic labeling methods are usually limited to protein termini where they are least  
41 likely to inhibit assembly and/or function<sup>6, 7</sup>. In addition, many labeling approaches involve  
42 production of a target protein from a genetic construct (*e.g.*, a plasmid) that removes the gene  
43 from its native genomic regulatory context, and this can perturb the component stoichiometry  
44 and/or cellular assembly process<sup>8</sup>. Attempts to overcome these issues by partially or fully *in vitro*  
45 reconstituting MBCs from recombinantly overexpressed, purified, and labeled components often  
46 results in compositionally and/or functionally heterogeneous MBC mixtures that exhibit impaired  
47 activities<sup>8</sup>.

48 Here, we report an approach that integrates homologous recombination-based  
49 multiplexed genome engineering (MGE)<sup>9</sup>, ncAA mutagenesis technology<sup>10</sup>, and bioorthogonal  
50 chemistry<sup>11</sup> to rapidly generate numerous, fully functional MBC variants in which each variant  
51 can carry a biochemical or biophysical label at one or more defined target positions. Our  
52 approach combines the power of MGE to rapidly generate multiple, orthogonal codon mutations  
53 (Fig. 1a) with the specificity and modularity of bioorthogonal ncAA-based conjugation chemistry,  
54 while maintaining the genomic regulatory context, *in vivo* assembly pathway, and functional  
55 integrity of the target MBC (Fig. 1b-c). Because ncAA mutations are much less perturbative than  
56 peptide tag insertions and because small-molecule, chemistry-based conjugation is much less  
57 sterically restricted than enzyme-based conjugation, our approach allows efficient labeling of  
58 virtually any position in an MBC. Additionally, because our method requires that each strain  
59 carrying a variant MBC effectively competes with the strain carrying the wild-type MBC, our  
60 approach naturally counter-selects against variants that impair MBC function. Finally, the  
61 abundance of biochemical and biophysical probes that have been derivatized for bioorthogonal  
62 conjugation means that MBCs can be labeled with optical probes such as fluorophores and  
63 quenchers, affinity tags such as biotin and digoxigenin, radioisotopes, spin-labels, chemical

Desai, B.J., *et al.*

64 probing agents, crosslinking agents, solid-state supports, nanoparticles, microspheres, *etc.*, for  
65 use in a nearly endless array of biochemical and biophysical applications (Fig. 1d).

66 To demonstrate the power of our approach, we chose to target the *Escherichia coli*  
67 ribosome – a 2.5 MDa, two-subunit MBC comprised of 55 ribosomal proteins and 3 ribosomal  
68 RNAs (rRNAs). In bacteria, assembly and maturation of the ribosome is a complex process that  
69 requires the action of ~100 cellular factors<sup>2</sup>. The importance of the genomic regulation and *in*  
70 *vivo* assembly and maturation process of this MBC is highlighted by the observation that  
71 ribosomes composed of a fully *in vitro* reconstituted small, or 30S, ribosomal subunit are only 34  
72 % active compared to ribosomes composed of 30S subunits purified from cells<sup>8</sup>, a fact that has  
73 complicated interpretation of biophysical studies performed using ribosomes composed of 30S  
74 subunits that were site-specifically fluorophore-labeled *via* full *in vitro* reconstitution<sup>12</sup>. For site-  
75 specific labeling of the ribosome, we targeted thirteen different positions across nine ribosomal  
76 protein genes (Table 1, Supplementary Fig. 1), such that labeling with fluorophores at those  
77 positions would enable smFRET studies of three ribosomal structural rearrangements that have  
78 either been studied using smFRET signals that could not be interpreted unambiguously<sup>13, 14</sup> or  
79 that have otherwise remained inaccessible to smFRET studies: (i) intra-subunit rotation of the  
80 'head' domain of the 30S subunit relative to the 'body' domain (*i.e.*, 'head swiveling', HS), (ii)  
81 movement of a translating ribosome along its mRNA template (*i.e.*, 'mRNA translocation', MT),  
82 and (iii) rotation of the large, or 50S, ribosomal subunit relative to the 30S subunit (*i.e.*,  
83 'intersubunit rotation', IR) (Supplementary Fig.1).

84 In order to site specifically label the *E. coli* ribosome at the selected thirteen positions,  
85 we decided to genomically encode the ncAA *p*-azido-phenylalanine (*p*-AzF) using engineered  
86 UAG stop codons that are typically decoded by polypeptide release factor (RF) 1 during  
87 translation termination. The choice of *p*-AzF was driven by the fact that it undergoes a rapid and  
88 robust, bioorthogonal conjugation reaction with dibenzocyclooctyne (DBCO)-derivatized<sup>15</sup> labels  
89 under mild buffer and temperature conditions (Fig. 1c). To genomically encode *p*-AzF at

Desai, B.J., *et al.*

90 engineered UAG stop codons in a manner that was free of potential competition from RF1-  
91 mediated translation termination, we chose to use the C321ΔA strain of *E. coli* that has been  
92 developed by Church and co-workers<sup>16</sup> (Methods). In C321ΔA, all 321 naturally occurring,  
93 essential TAG stop codons in *E. coli* have been converted to TAA stop codons that are decoded  
94 by RF2 and, moreover, the gene encoding RF1, *prfA*, has been deleted. Additionally, C321ΔA  
95 carries a temperature-inducible lambda prophage for carrying out single-stranded, DNA-guided  
96 homologous recombination (*i.e.*, lambda Red ( $\lambda_{Red}$ )-mediated recombineering)<sup>17</sup>, thus allowing  
97 MGE to be used to introduce codon mutations at the desired labeling positions. To tailor  
98 C321ΔA for use with ribosomes, we disrupted the gene encoding RNase A<sup>18-20</sup> (Methods), and  
99 to tailor it for *p*-AzF incorporation, we transformed it with a plasmid expressing an orthogonal  
100 nonsense suppressor tRNA that recognizes UAG codons and a tRNA synthetase specific for  
101 amino-acylating this tRNA with *p*-AzF<sup>21, 22</sup> (Methods).

102 Starting with our tailored C321ΔA strain, we performed six to eight rounds of  $\lambda_{Red}$ -  
103 mediated MGE using a multiplexed pool of oligonucleotides targeting the thirteen labeling sites  
104 for mutation to TAG stop codons in the ribosomal protein genes in the *E. coli* genome  
105 (Supplementary Table 1) (Methods). All rounds of MGE were performed in the presence of 1  
106 mM *p*-AzF such that incorporation of the ncAA into the MBC occurs immediately upon  
107 introduction of the mutation into the genome. The resulting cell population was screened using  
108 multiplexed, allele-specific colony (MASC)-PCR<sup>23</sup> (Methods) such that we could identify strains  
109 carrying the mutations as well as the position and nature of the mutations (Supplementary Fig.  
110 2). Once identified, the presence of mutations was further confirmed by Sanger sequencing  
111 (Supplementary Fig. 3). Using this approach, we were able to isolate ten strains in which each  
112 strain carried either one or two TAG mutations at locations corresponding to ten of the thirteen  
113 positions we originally targeted. We hypothesized that strains carrying TAG mutations at the  
114 remaining three positions could not be isolated because these mutations conferred significant  
115 fitness disadvantages. Supporting this hypothesis, the percent enrichment of mutation at each

Desai, B.J., *et al.*

116 of the targeted positions ranged between two- to ten-fold lower than a mutation of a similar size  
117 in a non-essential gene (Table 1). These observations are consistent with our expectation that,  
118 during the rounds of MGE, our approach selects for MBCs with functionally permissible  
119 mutations.

120 To demonstrate that the isolated, mutant *E. coli* strains were able to assemble  
121 ribosomes with site-specific incorporation of a *p*-AzF that can be efficiently labeled, we first  
122 purified ribosomes from three double-mutant strains (HS1, HS2, and IR1), and one single-  
123 mutant strain (MT1) (Methods). To ensure high-efficiency labeling, we separated the purified  
124 ribosomes into 30S and 50S subunits. The subunits were then labeled with DBCO-derivatized  
125 Cy3 and/or Cy5 fluorophores (Methods). The ribosomal proteins from each subunit were  
126 separated on an SDS-PAGE gel, and the gel was imaged using a fluorescence gel scanner  
127 (Fig. 2a). In these scans, fluorescence was observed exclusively from bands corresponding to  
128 ribosomal protein(s) whose gene(s) contained the TAG mutation(s). Moreover, fluorescence  
129 scanning of an SDS-PAGE gel containing ribosomal proteins obtained from the 30S and 50S  
130 subunits of a C321ΔA strain that did not contain any TAG mutations, but that was otherwise  
131 grown in the presence of *p*-AzF and used to purify and fluorophore-label the 30S and 50S  
132 subunits in a manner identical to that of the strains containing TAG mutations did not exhibit any  
133 fluorescence. This observation demonstrates the site-specific nature of *p*-AzF incorporation into  
134 the ribosomal proteins of the mutant strains (Supplementary Fig. 4). To measure the labeling  
135 efficiency of each labeled position, we quantified the fluorescence intensity of each labeled  
136 protein band, and compared it to a standard curve generated using known quantities of a  
137 fluorophore-labeled protein standard (Supplementary Fig. 5) (Methods). We found that the  
138 labeling efficiency was different for each targeted position, and ranged from a high of 96 % for  
139 labeling at the aspartic acid at residue position 41 on the 30S subunit protein S6 (S6 D41) to a  
140 low of 15 % for S7 G112 (Supplementary Table 2). While it's possible that the lower labeling  
141 efficiencies could be due to low *p*-AzF incorporation caused by background suppression of the

Desai, B.J., *et al.*

142 UAG mutation by near-cognate aa-tRNAs (e.g., Tyr-tRNA), such background suppression has  
143 been found to be quite low in C321ΔA-based strains in presence of *p*-AzF<sup>21</sup> and we therefore  
144 suspect it is more likely due to incomplete fluorophore labeling arising from the potentially low  
145 solvent exposure of the targeted residue. Regardless of the origin of any low labeling efficiency,  
146 because our approach uses MGE, it is easy to screen for another, comparable labeling position  
147 with higher labeling efficiency.

148 To demonstrate the utility of our labeled ribosomes for smFRET studies, we performed  
149 smFRET experiments using wide-field, total internal reflection fluorescence (TIRF) microscopy  
150 (Methods). In these experiments, ribosomal complexes assembled on a 5'-biotinylated mRNA  
151 using the Cy3 FRET donor- and/or Cy5 FRET acceptor-labeled ribosomes described above and  
152 any required tRNAs and/or translation factors were tethered to the surface of a polyethylene  
153 glycol (PEG)/biotin-PEG-derivatized quartz microfluidic flow-cell using a biotin-streptavidin-biotin  
154 bridge (Fig. 2b). As previously described, tethered complexes were illuminated using the  
155 evanescent wave generated by the 532 nm laser component of the TIRF microscope, and Cy3  
156 and Cy5 fluorescence emissions from individual ribosomes were collected, wavelength  
157 separated, and imaged using the optical and detector components of the TIRF microscope<sup>24, 25</sup>.  
158 We imaged complexes harboring the HS1, MT1, and IR1 smFRET signals and, in each case,  
159 we observed Cy3- and Cy5 fluorescence intensity *versus* time trajectories that exhibited anti-  
160 correlated Cy3 and Cy5 fluorescence intensity changes followed by single-step photobleaching  
161 of the Cy3- and/or Cy5 fluorophore, demonstrating that the complexes contained single Cy3-  
162 and Cy5 fluorophores that were positioned so as to generate detectable FRET efficiencies  
163 ( $E_{\text{FRET}}$ ) (Fig. 2c). For each complex, the  $E_{\text{FRET}}$  *versus* time trajectories matched our  
164 expectations regarding the  $E_{\text{FRET}}$  values we observed and whether the trajectories remained at a  
165 single  $E_{\text{FRET}}$  value or fluctuated between multiple  $E_{\text{FRET}}$  values as a function of time. Thus, the  
166 new smFRET signals reported here can now be used for smFRET studies of ribosomal complex  
167 dynamics that have heretofore remained difficult or impossible to interpret or perform due to the

Desai, B.J., *et al.*

168 lack of a facile, versatile, and robust method for generating *in vivo* assembled, fully functional,  
169 site-specifically labeled ribosomes.

170         In conclusion, we have demonstrated how a combination of MGE, ncAA mutagenesis  
171 technology, and bioorthogonal chemistry can be used to label MBCs with biochemical or  
172 biophysical probes without significantly perturbing the genomic regulation, *in vivo* assembly,  
173 structure, or function of the MBCs. Our method is general, facile, versatile, and robust and can  
174 therefore be used to site-specifically label any MBC at virtually any position with almost any type  
175 of probe, enabling a wide array of biochemical and biophysical studies of MBCs. Moreover,  
176 given recent advances in the use of MGE and ncAAs in other bacterial<sup>26</sup>, yeast<sup>27</sup>, and  
177 mammalian cells<sup>28</sup>, our approach can be readily expanded for site-specific labeling of both  
178 bacterial and eukaryotic MBCs. In addition, combining MGE with co-selection or counter-  
179 selection methods<sup>29</sup> should further improve the ease, efficiency, and success of our approach.  
180 Likewise, emerging improvements in ncAA mutagenesis technology to recode sense codons  
181 and quadruplet codons (*i.e.*, *via* +1 frameshifting) as well innovations in novel bioorthogonal  
182 chemistries should allow future expansion of the approach described here to include multi-site-  
183 specific bioorthogonal labeling of MBCs.



Desai, B.J., *et al.*

184 **REFERENCES**

- 185 1. Frank, J. & Gonzalez, R.L., Jr. Structure and dynamics of a processive Brownian motor: the  
186 translating ribosome. *Annu Rev Biochem* **79**, 381-412 (2010).
- 187 2. Shajani, Z., Sykes, M.T. & Williamson, J.R. Assembly of bacterial ribosomes. *Annu Rev*  
188 *Biochem* **80**, 501-526 (2011).
- 189 3. Shoji, S., Dambacher, C.M., Shajani, Z., Williamson, J.R. & Schultz, P.G. Systematic  
190 chromosomal deletion of bacterial ribosomal protein genes. *J Mol Biol* **413**, 751-761 (2011).
- 191 4. Davis, J.H. et al. Modular Assembly of the Bacterial Large Ribosomal Subunit. *Cell* **167**,  
192 1610-1622 e1615 (2016).
- 193 5. Marino, S.M. & Gladyshev, V.N. Analysis and functional prediction of reactive cysteine  
194 residues. *J Biol Chem* **287**, 4419-4425 (2012).
- 195 6. Chen, X. & Wu, Y.W. Selective chemical labeling of proteins. *Org Biomol Chem* **14**, 5417-  
196 5439 (2016).
- 197 7. Lotze, J., Reinhardt, U., Seitz, O. & Beck-Sickinger, A.G. Peptide-tags for site-specific  
198 protein labelling in vitro and in vivo. *Mol Biosyst* **12**, 1731-1745 (2016).
- 199 8. Culver, G.M. & Noller, H.F. Efficient reconstitution of functional Escherichia coli 30S  
200 ribosomal subunits from a complete set of recombinant small subunit ribosomal proteins.  
201 *RNA* **5**, 832-843 (1999).
- 202 9. Wang, H.H. et al. Programming cells by multiplex genome engineering and accelerated  
203 evolution. *Nature* **460**, 894-898 (2009).
- 204 10. Lang, K. & Chin, J.W. Cellular incorporation of unnatural amino acids and bioorthogonal  
205 labeling of proteins. *Chem Rev* **114**, 4764-4806 (2014).
- 206 11. Lang, K. & Chin, J.W. Bioorthogonal reactions for labeling proteins. *ACS Chem Biol* **9**, 16-  
207 20 (2014).
- 208 12. Cornish, P.V., Ermolenko, D.N., Noller, H.F. & Ha, T. Spontaneous intersubunit rotation in  
209 single ribosomes. *Mol Cell* **30**, 578-588 (2008).
- 210 13. Adio, S. et al. Fluctuations between multiple EF-G-induced chimeric tRNA states during  
211 translocation on the ribosome. *Nat Commun* **6**, 7442 (2015).
- 212 14. Wasserman, M.R., Alejo, J.L., Altman, R.B. & Blanchard, S.C. Multiperspective smFRET  
213 reveals rate-determining late intermediates of ribosomal translocation. *Nat Struct Mol Biol*  
214 **23**, 333-341 (2016).
- 215 15. Jewett, J.C., Sletten, E.M. & Bertozzi, C.R. Rapid Cu-free click chemistry with readily  
216 synthesized biarylazacyclooctynones. *J Am Chem Soc* **132**, 3688-3690 (2010).
- 217 16. Lajoie, M.J. et al. Genomically recoded organisms expand biological functions. *Science*  
218 **342**, 357-360 (2013).
- 219 17. Yu, D. et al. An efficient recombination system for chromosome engineering in Escherichia  
220 coli. *Proc Natl Acad Sci U S A* **97**, 5978-5983 (2000).

Desai, B.J., *et al.*

- 221 18. Wade, H.E. & Robinson, H.K. The inhibition of ribosomal ribonuclease by bacterial  
222 ribosomes. *Biochem J* **97**, 747-753 (1965).
- 223 19. Kurylo, C.M. et al. Genome Sequence and Analysis of Escherichia coli MRE600, a  
224 Colicinogenic, Nonmotile Strain that Lacks RNase I and the Type I Methyltransferase,  
225 EcoKI. *Genome Biol Evol* **8**, 742-752 (2016).
- 226 20. Cammack, K.A. & Wade, H.E. The sedimentation behaviour of ribonuclease-active and -  
227 inactive ribosomes from bacteria. *Biochem J* **96**, 671-680 (1965).
- 228 21. Amiram, M. et al. Evolution of translation machinery in recoded bacteria enables multi-site  
229 incorporation of nonstandard amino acids. *Nat Biotechnol* **33**, 1272-1279 (2015).
- 230 22. Chin, J.W. et al. Addition of p-azido-L-phenylalanine to the genetic code of Escherichia coli.  
231 *J Am Chem Soc* **124**, 9026-9027 (2002).
- 232 23. Wang, H.H. & Church, G.M. Multiplexed Genome Engineering and Genotyping Methods:  
233 Applications for Synthetic Biology and Metabolic Engineering. *Method Enzymol* **498**, 409-  
234 426 (2011).
- 235 24. Fei, J., Kosuri, P., MacDougall, D.D. & Gonzalez, R.L., Jr. Coupling of ribosomal L1 stalk  
236 and tRNA dynamics during translation elongation. *Mol Cell* **30**, 348-359 (2008).
- 237 25. Fei, J. et al. A highly purified, fluorescently labeled in vitro translation system for single-  
238 molecule studies of protein synthesis. *Methods Enzymol* **472**, 221-259 (2010).
- 239 26. Adiego-Perez, B. et al. Multiplex genome editing of microorganisms using CRISPR-Cas.  
240 *FEMS Microbiol Lett* **366** (2019).
- 241 27. DiCarlo, J.E. et al. Yeast oligo-mediated genome engineering (YOGE). *ACS Synth Biol* **2**,  
242 741-749 (2013).
- 243 28. Cong, L. et al. Multiplex genome engineering using CRISPR/Cas systems. *Science* **339**,  
244 819-823 (2013).
- 245 29. Carr, P.A. et al. Enhanced multiplex genome engineering through co-operative  
246 oligonucleotide co-selection. *Nucleic Acids Res* **40**, e132 (2012).
- 247 30. Blanchard, S.C., Gonzalez, R.L., Kim, H.D., Chu, S. & Puglisi, J.D. tRNA selection and  
248 kinetic proofreading in translation. *Nat Struct Mol Biol* **11**, 1008-1014 (2004).
- 249 31. Sternberg, S.H., Fei, J., Prywes, N., McGrath, K.A. & Gonzalez, R.L., Jr. Translation factors  
250 direct intrinsic ribosome dynamics during translation termination and ribosome recycling.  
251 *Nat Struct Mol Biol* **16**, 861-868 (2009).
- 252 32. Wang, J., Caban, K. & Gonzalez, R.L., Jr. Ribosomal initiation complex-driven changes in  
253 the stability and dynamics of initiation factor 2 regulate the fidelity of translation initiation. *J*  
254 *Mol Biol* **427**, 1819-1834 (2015).
- 255 33. Fei, J., Richard, A.C., Bronson, J.E. & Gonzalez, R.L., Jr. Transfer RNA-mediated  
256 regulation of ribosome dynamics during protein synthesis. *Nat Struct Mol Biol* **18**, 1043-  
257 1051 (2011).

Desai, B.J., *et al.*

- 258 34. Hussain, T., Llacer, J.L., Wimberly, B.T., Kieft, J.S. & Ramakrishnan, V. Large-Scale  
259 Movements of IF3 and tRNA during Bacterial Translation Initiation. *Cell* **167**, 133-144 e113  
260 (2016).
- 261 35. Elvekrog, M.M. & Gonzalez, R.L., Jr. Conformational selection of translation initiation factor  
262 3 signals proper substrate selection. *Nat Struct Mol Biol* **20**, 628-633 (2013).
- 263 36. Caban, K., Pavlov, M., Ehrenberg, M. & Gonzalez, R.L., Jr. A conformational switch in  
264 initiation factor 2 controls the fidelity of translation initiation in bacteria. *Nat Commun* **8**,  
265 1475 (2017).
- 266 37. Edelstein, A.D. et al. Advanced methods of microscope control using muManager software.  
267 *J Biol Methods* **1** (2014).
- 268 38. Ning, W., Fei, J. & Gonzalez, R.L., Jr. The ribosome uses cooperative conformational  
269 changes to maximize and regulate the efficiency of translation. *Proc Natl Acad Sci U S A*  
270 **111**, 12073-12078 (2014).
- 271

Desai, B.J., *et al.*

272 **ACKNOWLEDGEMENTS**

273 We thank Harris Wang and Jimin Park for helpful discussions regarding MGE, Bridget Huang  
274 and Haixing Li for supplying useful reagents, and Colin Kinz-Thompson and Kelvin Caban for  
275 comments on the manuscript. This work was supported by funds to R.L.G. from the National  
276 Institute of Health (R01 GM084288 and R01 GM119386).

277

278 **AUTHOR CONTRIBUTIONS**

279 B.J.D. and R.L.G. designed the experiments. B.J.D. performed the experiments. B.J.D. and  
280 R.L.G. analyzed the results. B.J.D. and R.L.G. wrote the manuscript. Both authors agreed to the  
281 final version of the manuscript.

282

283 **COMPETING INTERESTS**

284 The authors declare no competing financial interests.

Desai, B.J., *et al.*

## 285 **ONLINE METHODS**

### 286 **Strains and Plasmids**

287 The C321ΔA strain was a kind gift from George Church<sup>16</sup>. It is an *E. coli* MG1655 strain in which  
288 all 321 naturally occurring essential TAG stop codons have been changed to TAA stop codons  
289 and the gene encoding RF1, *prfA*, has been deleted. Its exact genotype is: Δ(ybhB-  
290 bioAB)::[lcl857 N(cro-ea59)::tetR-bla] ΔprfA ΔmutS::zeoR. To render the C321ΔA strain RNase  
291 A deficient, we performed four homologous recombination cycles using a mutagenic  
292 oligonucleotide that targeted the ninth codon of the gene encoding RNase A, *ma*, for mutation  
293 to a TAA stop codon using a previously described method<sup>9, 23</sup>. Strains containing the analogous  
294 mutation in *ma* are standard tools in biochemical and biophysical studies of ribosomes,  
295 translation, and translational control<sup>18-20</sup>. The pEvol-pAzFRS.2.t1 plasmid encoding an  
296 orthogonal nonsense suppressor tRNA that recognizes UAG codons and the tRNA synthetase  
297 that specifically amino-acylates this tRNA with *p*-AzF was a kind gift from Farren Isaacs.<sup>21</sup> For  
298 the experiments described here, we transformed the RNase A-deficient C321ΔA strain with  
299 pEvol-pAzFRS.2.t1.

300

### 301 **Multiplexed genome engineering cycles**

302 Thirteen oligonucleotides targeting different codon sites in ribosomal protein genes for mutation  
303 to TAG codons were designed as previously described<sup>9, 23</sup>, and purchased from Integrated DNA  
304 Technologies Inc. (Supplementary Table 1). MGE cycles were performed using the RNase A-  
305 deficient C321ΔA strain that had been transformed with the pEvol-pAzFRS.2.t1 plasmid and  
306 following a previously published procedure<sup>9, 23</sup>. All of the media used for MGE contained 1 mM  
307 *p*-AzF and 0.2 % arabinose. Cultures at the end of 6-8 MGE cycles were used to screen for  
308 mutant strains using MASC-PCR (*infra vide*). If a double mutant was needed, as in the case of  
309 generating the HS signals, one of the successfully engineered single-mutant strains was

Desai, B.J., *et al.*

310 subjected to single-plexed genome engineering using the oligonucleotide targeting the second  
311 successfully engineered position.

312

### 313 **Screening for mutants and calculation of percent enrichment**

314 MASC-PCR was used to screen for mutant strains in the pool of cells present in the culture after  
315 6-8 MGE cycles, using previously published methods<sup>9, 23</sup>. Colonies that tested positive for  
316 mutations in the MASC-PCR screening were sequenced by Sanger sequencing (Genewiz) in  
317 order to confirm the presence and identity of the mutation. The percent enrichment of a  
318 particular mutation was calculated by dividing the number of confirmed mutant colonies by the  
319 total number of colonies screened and multiplying the result by 100.

320

### 321 **Ribosome purification and labeling**

322 70S ribosomes were purified using previously established procedures<sup>30</sup> with slight  
323 modifications. 1 mL culture of C321ΔA wt or isolated mutant strain was used to inoculate 1L of  
324 2× Yeast Tryptone media (2× YT) containing 1mM *p*-AzF, and 0.2 % arabinose. The culture was  
325 grown to mid-log phase (OD 0.5), and the cells were harvested by centrifugation at 5000×g for  
326 10 min. The actively translating 70S ribosomes and polysomes were then purified from the  
327 harvested cells as previously described<sup>30</sup>.

328 In order to efficiently label the ribosomal subunits with DBCO-derivatized Cy3 and/or  
329 Cy5, the purified 70S ribosomal pellet was gently resuspended in Low Magnesium Buffer (20  
330 Tris(hydroxymethyl)aminomethane (Tris) acetate (OAc) at pH<sub>RT</sub> = 7.5, 60 mM ammonium  
331 chloride (NH<sub>4</sub>Cl), 1 mM magnesium acetate (Mg(OAc)<sub>2</sub>), 0.5 mM ethylenediaminetetraacetic  
332 acid (EDTA), and 6 mM 2-mercaptoethanol (β-ME)) such that the 70S ribosomes would  
333 dissociate into their component 30S and 50S subunits and the resulting solution was diluted  
334 such that the final concentrations of 30S and 50S subunits was 1 μM each. DBCO-derivatized

Desai, B.J., *et al.*

335 Sulfo-Cy3 and/or DBCO-derivatized Sulfo-Cy5 (Lumiprobe) were then added to the diluted 30S  
336 and 50S subunits to a final concentration of 10  $\mu$ M. The labeling reaction was carried out at 4 °C  
337 for 12 hours in the dark. The labeling reaction was then dialyzed against Low Magnesium Buffer  
338 to remove excess, unconjugated fluorophores. Labeled 30S and/or 50S subunits were then  
339 purified from the labeling reactions as previously reported using sucrose gradient  
340 ultracentrifugation in Low Magnesium Buffer<sup>25</sup>. Labeling efficiencies were calculated by  
341 interpolating the cumulative fluorescence intensity of each labeled protein band from an SDS-  
342 PAGE gel of labeled 30S and/or 50S subunits from linear standard curves generated using Cy3-  
343 or Cy5-labeled protein standards of defined quantities and labeling efficiencies. Specifically, the  
344 Cy3- and Cy5-labeled protein standards we used were L1 Q18C-Cy3 (L1 [Cy3]) and RF1 S167C-  
345 Cy5 (RF1 [Cy5]), respectively, that were isolated, labeled, and purified so as to exhibit 100 %  
346 Cy3- or Cy5 labeling efficiencies as previously described<sup>24, 31</sup> (Supplementary Fig. 4).

347

#### 348 **Preparation of mRNAs, tRNAs, and translation factors**

349 Ribosomal complexes for smFRET experiments using the HS and IR smFRET signals were  
350 assembled on a previously described<sup>32, 33</sup>, 5'-biotinylated model mRNA that is a variant of the  
351 mRNA encoding bacteriophage T4 gene product 32 (Bio-mRNA). Bio-mRNA was chemically  
352 synthesized (IDT) (Supplementary Table 3). Ribosomal complexes for smFRET experiments  
353 using the MT smFRET signal were assembled on a previously described<sup>30</sup>, non-biotinylated  
354 model mRNA consisting of the first twenty codons of bacteriophage T4 gene product 32  
355 (NonBio-mRNA) that was hybridized to a previously described<sup>30</sup>, 5'-Cy5-labeled, 3'-biotinylated  
356 DNA oligonucleotide (Cy5-DNA-Bio) (Supplementary Table 3). NonBio-mRNA was synthesized  
357 by *in vitro* transcription using bacteriophage T7 RNA polymerase, as previously described<sup>25</sup>, and  
358 Cy5-DNA-Bio was chemically synthesized (IDT). Hybridization of NonBio-mRNA with Cy5-DNA-  
359 Bio was performed as previously described<sup>25</sup>. The hybridized NonBio-mRNA: Cy5-DNA-Bio was  
360 purified away from excess, unhybridized Cy5-DNA-Bio using size-exclusion chromatography. *E.*

Desai, B.J., *et al.*

361 *coli* initiator, formylmethionine-specific tRNA (tRNA<sup>fMet</sup>) was purchased from MP Bio and was  
362 aminoacylated and formylated using methionyl-tRNA synthetase and methionyl-tRNA  
363 formyltransferase, respectively, using previously published procedures<sup>30</sup>. *E. coli* translation  
364 initiation factors (IFs) 1, 2, and 3 were expressed and purified using established protocols as  
365 described elsewhere<sup>25</sup>.

366

### 367 **Preparation of ribosomal complexes for smFRET experiments**

368 To perform smFRET experiments using the HS smFRET signal, we attempted to prepare a 30S  
369 initiation complex (IC) similar to one that has been described as exhibiting HS dynamics in a  
370 recent cryo-EM study by Ramakrishnan and co-workers<sup>34</sup>. To do this, we adapted general  
371 protocols that we have previously developed for the preparation of 30S ICs<sup>35, 36</sup>. Specifically, we  
372 incubated 0.6  $\mu$ M 30S subunits labeled with Cy3 and Cy5 (30S HS1 [Cy3/Cy5]), 1.8  $\mu$ M Bio-  
373 mRNA (Supplementary Table 3), 0.9  $\mu$ M fMet-tRNA<sup>fMet</sup>, 0.9  $\mu$ M IF1, and 0.6  $\mu$ M IF3 in Tris-  
374 Polymix Buffer (50 mM Tris-OAc at pH<sub>RT</sub> = 7.5, 100 mM KCl, 5 mM ammonium acetate  
375 (NH<sub>4</sub>OAc), 5 mM Mg(OAc)<sub>2</sub>, 0.1 mM EDTA, 1 mM guanosine triphosphate (GTP), 5 mM  
376 putrescine-HCl, 1 mM spermidine-free base, and 6 mM  $\beta$ -ME) for 10 minutes at 37 °C and  
377 subsequently transferred the reaction to ice for an additional 5 minutes. The complexes were  
378 divided into 1  $\mu$ L aliquots and flash-frozen by immersing the tube in liquid nitrogen. The aliquots  
379 were stored at -80 °C for future use<sup>35, 36</sup>. Given these reaction conditions, the fact that IF1 and  
380 IF3 were maintained at 1  $\mu$ M and 25 nM, respectively, in the buffers used throughout all  
381 complex formation, dilution, tethering, and imaging steps (*vide infra*), and the results of previous  
382 biochemical and smFRET work by us and others<sup>32</sup>, we expect this reaction to predominantly  
383 yield the IF1- and IF3-containing 30S IC that is schematized on the left-hand panel of Figure 2b.

384 To perform smFRET experiments using the MT smFRET signal, we attempted to  
385 prepare a 30S IC similar to one that has been described in a recent smFRET study by Gonzalez  
386 and co-workers<sup>32</sup>, that would serve as a preliminary proof-of-concept model for MT signal. To do



Desai, B.J., *et al.*

387 this, we again adapted general protocols that we have previously developed for the preparation  
388 of 30S ICs<sup>32, 35, 36</sup>. Specifically, we incubated 0.6  $\mu$ M 30S subunits labeled with Cy3 (30S MT1  
389 [Cy3]), 1.8  $\mu$ M NonBio-mRNA: Cy5-DNA-Bio (Supplementary Table 3), 0.9  $\mu$ M fMet-tRNA<sup>fMet</sup>, 0.9  
390  $\mu$ M IF1, and 0.9  $\mu$ M IF2 in Tris-Polymix Buffer for 10 minutes at 37 °C and subsequently  
391 transferred the reaction to ice for an additional 5 minutes. The complexes were divided into 1  $\mu$ L  
392 aliquots and flash-frozen by immersing the tubes in liquid nitrogen. The aliquots were stored at –  
393 80 °C for future use<sup>35, 36</sup>. Given these reaction conditions, the fact that IF1 and IF2 were  
394 maintained at 1  $\mu$ M and 25 nM, respectively, in the buffers used throughout all complex  
395 formation, dilution, tethering, and imaging steps, and the results of previous smFRET studies<sup>32</sup>,  
396 we expect this reaction to predominantly yield the IF1-, IF2-, and fMet-tRNA<sup>fMet</sup>-containing 30S  
397 IC that is schematized on the center panel of Figure 2b.

398 To perform smFRET experiments using the IR smFRET signal, we attempted to prepare  
399 a 70S pre-translocation complex mimic lacking a peptidyl-tRNA in the ribosomal aminoacyl-  
400 tRNA binding site (*i.e.*, a 70S PRE<sup>-A</sup> complex) similar to one that has been described as  
401 exhibiting IR dynamics in a previous smFRET study by Ha and co-workers<sup>12</sup>. To do this, we  
402 adapted general protocols that we have previously developed for the non-enzymatic preparation  
403 of 70S PRE<sup>-A</sup> complexes<sup>33</sup>. Specifically, we incubated 15 pmol 30S subunits labeled with Cy5  
404 (30S IR1 [Cy5]), 30 pmol Bio-mRNA (Supplementary Table 3), and 20 pmol deacylated tRNA<sup>fMet</sup>  
405 in 30  $\mu$ L of 70S PRE<sup>-A</sup> Assembly Buffer (50 mM Tris hydrochloride (Tris-HCl) at pH<sub>RT</sub> = 7.5, 70  
406 mM NH<sub>4</sub>OAc, 30 mM KCl, 6 mM  $\beta$ -ME, and 7 mM MgCl<sub>2</sub>) for 10 minutes at 37 °C, at which  
407 point 10 pmol 50S subunits labeled with Cy3 (50S IR1 [Cy3]) were added and the reaction  
408 incubated for additional 20 minutes at 37 °C. The reaction was then placed on ice for 5 minutes  
409 and diluted to a final volume of 100  $\mu$ L with Tris-Polymix Buffer that had been adjusted to 20  
410 mM Mg(OAc)<sub>2</sub>. The reaction was carefully layered on top of 10-40% (w/v) sucrose gradient  
411 made in Tris-Polymix Buffer adjusted to 20 mM Mg(OAc)<sub>2</sub> and purified by density gradient  
412 ultracentrifugation as previously described<sup>24, 33</sup>. The complexes were divided into 25  $\mu$ L aliquots

Desai, B.J., *et al.*

413 and flash-frozen by immersing the tubes in liquid nitrogen. The aliquots were stored at  $-80\text{ }^{\circ}\text{C}$   
414 for future use. Given these reaction conditions and the results of previous smFRET studies<sup>33</sup>,  
415 we expect this reaction to predominantly yield the 70S PRE<sup>-A</sup> that is schematized on the right-  
416 hand panel of Figure 2b.

417

#### 418 **TIRF-based smFRET experiments**

419 Ribosomal complexes were diluted to  $\sim 100\text{--}500\text{ }\mu\text{M}$  in Tris-Polymix Buffer adjusted to 5 mM  
420  $\text{Mg}(\text{OAc})_2$  for smFRET experiments using the HS1 and MT1 smFRET signals and to 15 mM  
421  $\text{Mg}(\text{OAc})_2$  for smFRET experiments using the IR1 smFRET signal and supplemented with 1  $\mu\text{M}$   
422 IF1 and 25 nM IF3 for smFRET experiments using the HS1 smFRET signal and 1  $\mu\text{M}$  IF1 and  
423 25 nM IF2 for smFRET experiments using the MT1 smFRET signal. The complexes were  
424 tethered to the PEG/Biotin-PEG-derivatized surfaces of our quartz microfluidic flow-cells *via* a  
425 biotin-streptavidin-biotin bridge by incubating the diluted complexes in our flow-cells for 5  
426 minutes, after which unbound complexes were flushed out of the flow-cells using the same Tris-  
427 Polymix Buffers that were used to dilute the complexes, but that had been further supplemented  
428 with an oxygen-scavenging system (5 mM protocatechuic acid and 10 nM protocatechuate-3,4-  
429 dioxygenase) and a triplet state quencher (1 mM cyclooctatetraene).

430 The tethered complexes were then imaged using a laboratory-built, wide-field, prism-  
431 based TIRF microscope with a diode-pumped solid-state 532 nm laser (Laser Quantum  
432 GEM532) as an excitation source for Cy3. Fluorescence emissions from Cy3 and Cy5 were  
433 collected through a 60 $\times$  magnification, water-immersion objective with a numerical aperture of  
434 1.2 (Nikon), wavelength separated using a Dual-View image-splitting device (Photometrics), and  
435 imaged using an water-cooled, electron-multiplying charged coupled device (EMCCD) camera  
436 (Andor iXon Ultra 888) operating with 2 $\times$  binning. 600-frame movies were collected at a time  
437 resolution of 0.1 second using  $\mu\text{Manager}$ <sup>37</sup>.

Desai, B.J., *et al.*

438 TIRF movies were analyzed using custom-written software (manuscript in preparation;  
439 Jason Hon, Colin Kinz-Thompson, R.L.G.). First, fluorophores were identified by locating local  
440 maxima pixels in the movie and classifying them into either 'fluorophore' or 'background'  
441 classes. The Cy3 and Cy5 imaging channels were then aligned by applying a polynomial  
442 transformation that had been separately computed using a control image of fiducial markers.  
443 Using the aligned Cy3 and Cy5 imaging channels, we next fit each Cy3 and Cy5 fluorophore in  
444 each image of the movie to a 2D Gaussian in order to estimate the Cy3 and Cy5 fluorescence  
445 intensity *versus* time trajectories for each identified and aligned pair of Cy3 and Cy5  
446 fluorophores. For each time point, Cy5 fluorescence intensity values were corrected for Cy3  
447 bleedthrough by subtracting 5% of the Cy3 fluorescence intensity value in the corresponding Cy3  
448 fluorescence intensity trajectory.  $E_{\text{FRET}}$  *versus* time trajectories were then generated by using the  
449 Cy3 fluorescence intensity trajectories and bleedthrough-corrected Cy5 fluorescence intensity  
450 trajectories to calculate the  $E_{\text{FRET}}$  value at each time point of the corresponding  $E_{\text{FRET}}$  trajectory.  
451 The  $E_{\text{FRET}}$  values were calculated by dividing the Cy5 fluorescence intensity ( $I_{\text{Cy5}}$ ) by the sum of  
452 the Cy3 and Cy5 fluorescence intensities ( $I_{\text{Cy5}} + I_{\text{Cy3}}$ ), as previously described<sup>38</sup>. Visual  
453 inspection was then used to select only those  $E_{\text{FRET}}$  trajectories for which the corresponding Cy3  
454 and Cy5 fluorescence intensity trajectories exhibited single-step photobleaching of both the Cy3  
455 and Cy5 fluorophores, thereby confirming that the  $E_{\text{FRET}}$  trajectory originated from a pair of  
456 single donor and acceptor fluorophores.

457

#### 458 **Data Availability**

459 The data supporting the findings of this study are available from the corresponding author upon  
460 request.

461

#### 462 **Code Availability**

Desai, B.J., *et al.*

463 The code used to analyze the TIRF movies in this study is available from the corresponding  
464 author upon request.

Desai, B.J., *et al.*

465 **Figure Legends**

466 **Figure 1.** Using a combination of MGE, ncAA mutagenesis technology, and bioorthogonal  
467 chemistry to site-specifically label MBCs without perturbing their genomic regulation, *in vivo*  
468 assembly, structure, or function. (a) Iterative MGE cycles are used to introduce orthogonal  
469 codon mutations (hexagons) at specific genomic positions in genes encoding MBC proteins in a  
470 background of wildtype parent strain. (b) *In vivo* expression and assembly of the MBC in each  
471 mutant strain, including the MBC protein carrying the incorporated ncAA (blue star), is achieved  
472 by performing the MGE cycles in the presence of a plasmid expressing an ncAA-specific,  
473 orthogonal tRNA-tRNA synthetase pair and in the presence of the ncAA in the growth media  
474 such that each resulting mutant strain can assemble MBCs carrying the ncAA at one of the  
475 targeted positions. In our case, we have used *p*-AzF as the ncAA and the pEvol-pAzFRS.2.t1  
476 plasmid to express the corresponding, orthogonal tRNA-tRNA synthetase pair. (c) ncAAs  
477 incorporated into MBCs purified from successfully selected mutant strains can be conjugated to  
478 an appropriately derivatized label or reporter (dark-grey) using bioorthogonal chemistry. In our  
479 case, we have used the strain-promoted, azide-alkyne, bioorthogonal conjugation reaction of *p*-  
480 AzF with DBCO-derivatized Cy3- and/or Cy5 fluorophores. (d) Examples of the different types of  
481 biochemical and biophysical labels and reporters that can be adapted to the approach described  
482 here and their respective applications in biochemical and biophysical studies of MBCs.

483

484 **Figure 2.** Site-specific Cy3- and/or Cy5 labeling of ribosomes purified from genomic mutant  
485 strains and smFRET experiments of ribosomal complexes assembled using labeled ribosomes.  
486 (a) SDS-PAGE analysis of ribosomal proteins derived from 30S or 50S subunits isolated from  
487 the IR1, MT1, HS1, and HS2 mutant strains and reacted with DBCO-derivatized Cy3- and/or  
488 Cy5 fluorophores. Left-hand panel shows visible light scan of Coomassie-stained gel. Middle and  
489 right-hand panels show fluorescence emission scans of pre-Coomassie-stained gel using  
490 excitation wavelengths of 532 nm for Cy3 (middle panel) and 635 nm for Cy5 (right-hand panel).

Desai, B.J., *et al.*

491 The position at which each labeled ribosomal protein is expected to run on the SDS-PAGE gel  
492 was determined using a standard protein molecular weight ladder, and is indicated on the right-  
493 hand side of the figure. (b) Schematics (top row), representative Cy3- and Cy5 fluorescence  
494 intensity *versus* time trajectories (center row), and corresponding  $E_{\text{FRET}}$  *versus* time trajectories  
495 (bottom row) for smFRET experiments performed on ribosomal complexes assembled using  
496 Cy3- and/or Cy5-labeled 30S and/or 50S subunits isolated from the HS1 (left column), MT1  
497 (middle column), and IR1 (right column) mutant strains. In the schematics, the surface of the  
498 microfluidic flow-cells are shown as a grey surface, PEGs are shown as grey spheres,  
499 biotinylated-PEGs are shown as black spheres, streptavidin is shown in blue-grey, mRNAs are  
500 shown as black curves, DNAs are shown as red curves, biotins at the 5' end of the mRNAs or  
501 the 3' end of the DNAs are shown as black spheres, the head domain of the 30S subunits is  
502 shown in yellow, the body domains of the 30S subunits are shown in tan, the 50S subunits are  
503 shown in light blue, the deacylated tRNA<sup>Met</sup> is shown in dark pink, IF1 is shown in orange, IF2 is  
504 shown in dark blue, IF3 is shown in dark green, the Cy3 fluorophores are shown as light green  
505 spheres, and the Cy5 fluorophores are shown as light red spheres. In the Cy3 and Cy5  
506 fluorescence intensity *versus* time trajectories, the Cy3 and Cy5 fluorescence intensities are  
507 shown as green and red curves, respectively. In the  $E_{\text{FRET}}$  *versus* time trajectories, the  $E_{\text{FRET}}$  is  
508 shown as blue curves.  
509

Desai, B.J., *et al.*

510 **FIGURES**

511 **Figure 1**

512

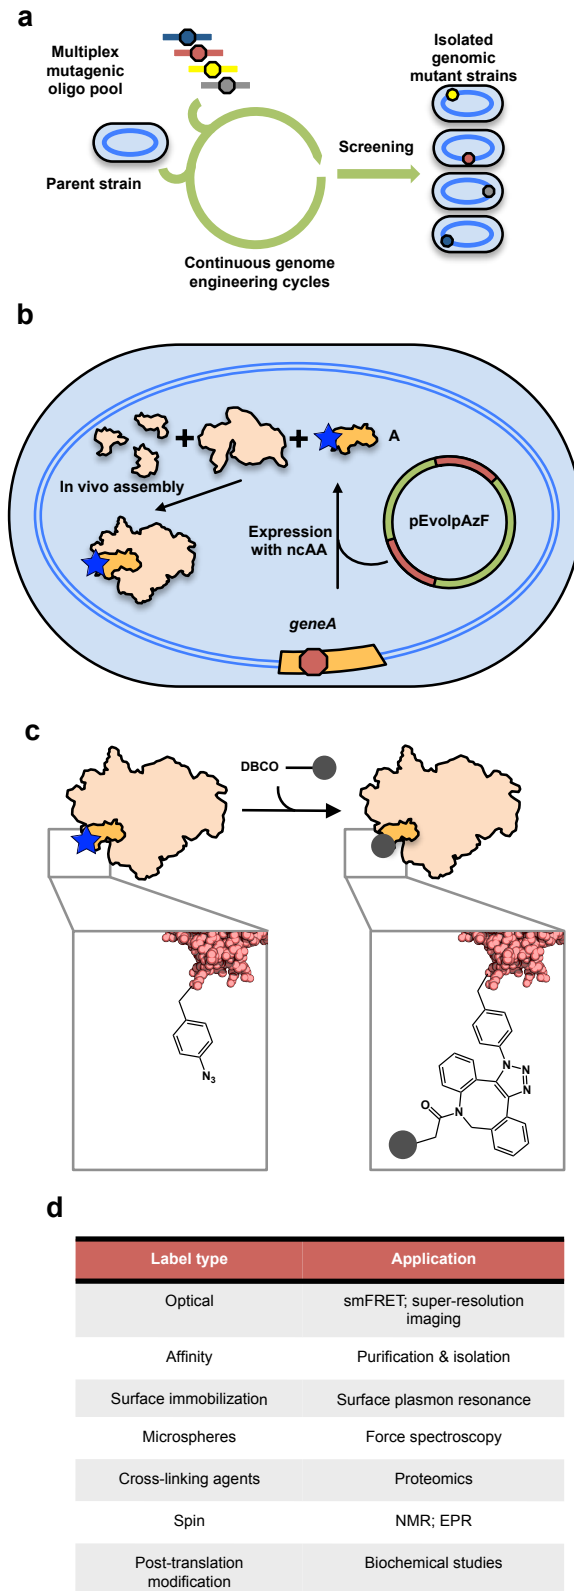

Desai, B.J., *et al.*

513 **Figure 2**

514

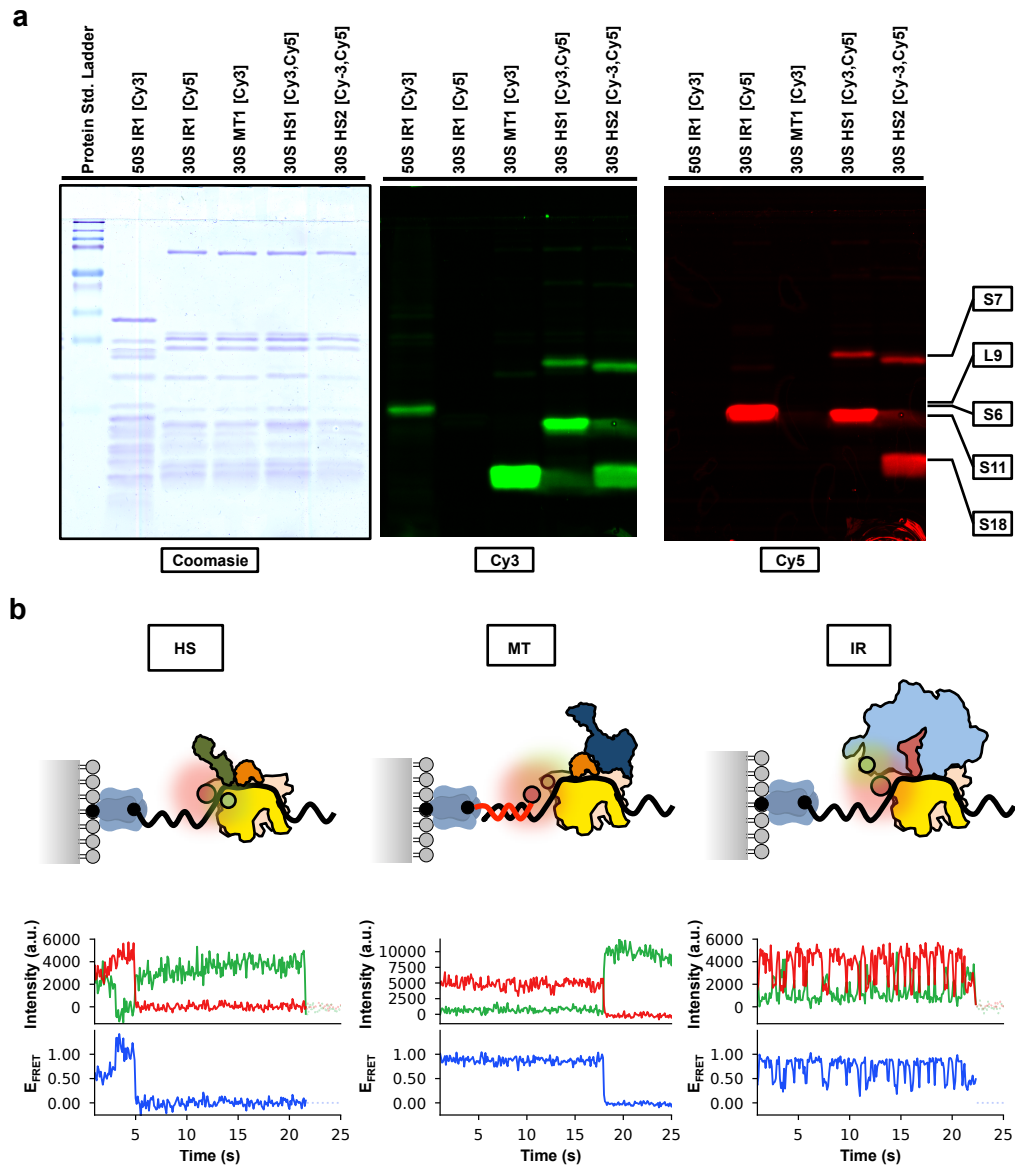



Desai, B.J., *et al.*

515 **TABLES**

516 **Table 1. Percent enrichment of mutants after MGE**

| <b>smFRET signal</b> | <b>Target for mutation</b> | <b>Number of bp mutated</b> | <b>Number of MGE cycles</b> | <b>Percent enrichment<sup>1</sup></b> |
|----------------------|----------------------------|-----------------------------|-----------------------------|---------------------------------------|
| <b>HS1</b>           | 30S S7G112                 | 3                           | 8                           | 1.0                                   |
|                      | 30S S11A102                | 3                           | 6                           | 1.0                                   |
| <b>HS2</b>           | 30S S7K131                 | 2                           | 8                           | 2.1                                   |
|                      | 30S S18R8                  | 2                           | 6                           | 2.1                                   |
| <b>HS3</b>           | 30S S7G112                 | 3                           | 8                           | 1.0                                   |
|                      | 30S S18Q75                 | 1                           | 8                           | 0                                     |
| <b>HS4</b>           | 30S S19Q56                 | 1                           | 8                           | 3.1                                   |
|                      | 30S S12K108                | 2                           | 6                           | 4.6                                   |
| <b>HS5</b>           | 30S S13D11                 | 2                           | 6                           | 0                                     |
|                      | 30S S11R106                | 3                           | 8                           | 0                                     |
| <b>MT1</b>           | 30S S18R8                  | 2                           | 6                           | 2.1                                   |
| <b>MT2</b>           | 30S S5E10                  | 2                           | 8                           | 1.0                                   |
| <b>IR1</b>           | 50S L9N11                  | 2                           | 8                           | 4.2                                   |
|                      | 30S S6D41                  | 2                           | 8                           | 1.0                                   |
| <b>IR2</b>           | 50S L9N11                  | 2                           | 8                           | 4.2                                   |
|                      | 30S S11E76                 | 2                           | 8                           | 1.0                                   |
| <b>Control</b>       | RNaseA A9                  | 3                           | 4                           | 10.4                                  |

517 <sup>1</sup>Percent enrichment was measured by dividing the dividing the number of mutant colonies detected by MASC-PCR  
518 and confirmed via Sanger sequencing by the total number of colonies that were screened by MASC-PCR and  
519 multiplying the result by 100.  
520

521
